# Supplementary material for: In situ formation of a low-dimensional perovskite structure for efficient single-crystal MAPbI3 solar cells with enhanced ambient stability
Source: Royal Society of Chemistry journal article supplement (doi:10.1039/d4tc04664a), 2025-01-01
Supplement: d4tc04664a1.pdf [file d4tc04664a1.pdf]

## Supporting Information

**In-Situ Formation of Low-Dimensional Perovskite Structure for Efficient Single-Crystal MAPbI<sub>3</sub> Solar Cells with Enhanced Ambient Stability**

*Mingxun Liu, Xinbo Guo, Nianqiao Liu, Changke Jiang, Jian Zhang, Zhaolai Chen, Yu Zhong\**

M. Liu, X. Guo, N. Liu, C. Jiang, Z. Chen, J. Zhang, Y. Zhong

State Key Laboratory of Crystal Materials,

Shandong University, Jinan 250100, P. R. China

E-mail: [yu.zhong@sdu.edu.cn](mailto:yu.zhong@sdu.edu.cn)

## Experimental Section

**Materials:** Lead (II) iodide (PbI<sub>2</sub>, 99.9%), gamma-butyrolactone (GBL, 99%), hydroiodic acid (HI) (57 wt.%, stabilized with 1.5% hypophosphorous acid), methylamine (CH<sub>3</sub>NH<sub>2</sub>, 40 wt.% in water), N, N-dimethylformamide (DMF, 99.9%) and isopropanol (IPA, 99.7%) were purchased from Aladdin Reagent Ltd. Methylammonium iodide (MAI) was synthesized as the following. Poly[bis(4-phenyl)(2,4,6-trimethylphenyl) amine (PTAA), fullerene (C<sub>60</sub>), bathocuproine (BCP) and 2-phenylethylamine hydroiodide (PEAI) were purchased from Xi'an Polymer Light Technology Corp. Chlorobenzene (CB, 99.5%) and PEDOT: PSS (2.7 wt % in H<sub>2</sub>O) were purchased from Sigma-Aldrich. Indium tin oxide glass (ITO) substrate was purchased from Advanced Election Technology (China). Au (99.999%) and Cu (99.999%) were purchased from ZhongNuo Advance Material Technology (China). All commercial materials were used without any further purification.

### 1. Preparation of CH<sub>3</sub>NH<sub>3</sub>I (MAI)

The mass fraction of 57 wt. % HI with a mass fraction of 40 wt. % of CH<sub>3</sub>NH<sub>2</sub> in water were mixed in the amount of 1:1 of the substance. The solution was stirred for 2 hours with ice water bath, then transferred to the flask of the rotary evaporator, and evaporated in vacuum at a temperature of 50 °C. Then the white precipitate was taken out, dissolved in ethanol, and then recrystallized with anhydrous ether. This evaporation-dissolution-recrystallization process was repeated for three times to obtain MAI with high purity. Afterwards, the prepared MAI was dried in a vacuum drying oven at 60 °C for 12 hours.

### 2. Preparation of MAPbI<sub>3</sub> single-crystal thin films

#### 2.1 Preparation of MAPbI<sub>3</sub> bulk single-crystals

The MAI prepared in procedure 1 was mixed with PbI<sub>2</sub> of with equal molar amount and dissolved in GBL to prepare 1.5 M MAPbI<sub>3</sub> solution. This solution was stirred and heated at 72 °C until the solid particles were completely dissolved. After that, the solution was transferred to the hot stage, and the temperature continued to rise at a rate of 2 °C h<sup>-1</sup>. As the temperature increased, MAPbI<sub>3</sub> crystals gradually precipitated from solution. When the temperature reached 120 °C, the crystals in the solution were taken out and was cooled to room temperature.

#### 2.2 Preparation of MAPbI<sub>3</sub> precursor solution

MAPbI<sub>3</sub> crystals prepared in 2.1 were dissolved in GBL and a clear yellow transparent solvent was obtained. This precursor solution was kept on a hot plate at 60 °C before use.

#### 2.3 Preparation of substrates

2 mg mL<sup>-1</sup> PTAA (its structure shown in Figure S1) solution in chlorobenzene was prepared and spin-coated on ITO glass (5 cm × 5 cm, have been washed with soap, deionized water, and anhydrous ethanol, followed by an ultraviolet-zone surface treatment for 15 min). Then the ITO glass was annealed on a hot plate at 100 °C for 10 min.

## 2.4 Growth of MAPbI<sub>3</sub> single-crystal thin films

The annealed cooled PTAA/ITO glass was placed on a 60 °C temperature-controlled stage for preheating, then 75 µL of perovskite precursor solution was dropped on it. After that, the PTAA/ITO glass was covered by another PTAA/ITO glass, with the precursor solution between them. The hot stage program was set for crystal growth with a rapid temperature increase of 30 °C h<sup>-1</sup> in the range of 60 - 74 °C and a slow temperature increase of 2 °C h<sup>-1</sup> in the range of 74 - 110 °C. The crystals nucleated and grew laterally between the two substrates. The MAPbI<sub>3</sub> single-crystal film with a lateral dimension of 3 - 6 mm and a thickness of 32 µm.

## 3. Surface modification of MAPbI<sub>3</sub> single-crystal films

PEAI solution in IPA was prepared and spin-coated on a MAPbI<sub>3</sub> single-crystal thin film substrate. PEA solution with the concentration of 0.5 mg mL<sup>-1</sup>, 0.75 mg mL<sup>-1</sup>, 1 mg mL<sup>-1</sup> and 1.5 mg mL<sup>-1</sup> was prepared. In order to explore the state of PEA's existence on the surface of perovskite single-crystals, (PEA)<sub>2</sub>PbI<sub>4</sub> two-dimensional perovskite films were made by mixing PEA and PbI<sub>2</sub> in DMF solvent with a molar ratio of 2:1 and a concentration of 0.5 M, and spin-coating on a glass substrate with PEDOT: PSS layer. After spin-coating, the sample was annealed at 50 °C for 30 min and a (PEA)<sub>2</sub>PbI<sub>4</sub> two-dimensional perovskite film was obtained.

## 4. Fabrication of MAPbI<sub>3</sub> perovskite single-crystal solar cells

The single-crystal thin films grown in procedure 2 and modified films in 3 were fabricated into single-crystal cells, respectively. The high-temperature tape was used to cover part of the edges of the single-crystal film to prevent a short circuit between the surface and ITO during the evaporation of the electrode. Finally, 20 nm C60, 3 nm BCP and 80 nm Cu electrodes were evaporated sequentially on the single-crystal film to prepare perovskite single-crystal solar cell.

## 5. Characterization

### Phase and surface analysis

The Smart Lab 9KW X-ray diffraction platform (from Rigaku, Japan) with Cu target, K $\alpha$  wavelength was utilized for determining perovskite crystals. The morphology and surface roughness of MAPbI<sub>3</sub> single-crystal films with and without surface modification was examined using SEM (ZEISS, G300 FE-SEM System) and AFM (Bruker Dimension Icon). The contact angle was measured by a surface tension meter (Sigma 700, Biolin Scientific).

### Spectroscopy analysis

Fourier Transform Infrared Spectroscopy (FTIR) was employed to detect organic functional groups in PEA powder and the perovskite single-crystal thin films with/without PEA modification. The NEXUS 670 FTIR-Raman spectrometer from Thermo Nicolet was used, which has a maximum resolution of 0.09 cm<sup>-1</sup> and a detection range of 7500 - 400 cm<sup>-1</sup>. *X-ray photoelectron spectroscopy (XPS)*: Thermo Fisher Scientific's ESCALAB 250 X-ray photoelectron spectrometer (optimal energy resolution 0.45 eV, optimal spatial resolution 3 µm, optimal sensitivity of monochromatic light source: 1,000,000 cps, ion gun spot < 150 µm) was used to analyze the elemental compositions and chemical states of the crystal surfaces. *Photoluminescence (PL) and Time-Resolved Photoluminescence (TRPL)*: Steady-state PL spectra were measured using a fluorescence spectrometer (FLS1000, Edinburgh Instruments). TRPL spectra were

measured using a nanosecond pulsed diode laser (405 nm) with a repetition frequency of 1 MHz as an excitation source. *UV-Vis absorption spectrum*: The ultraviolet–visible absorption spectra were recorded using a spectrophotometer (U-3500, HITACHI).

#### ***J-V Curve***

By using a solar simulator with the light intensity of  $100 \text{ mW cm}^{-2}$  (Sun 2000, ABET Technologies), the MAPbI<sub>3</sub> single-crystal solar cell was scanned for voltage from 1.2 V to -0.1 V at a rate of  $10 \text{ mV s}^{-1}$ . A metal photomask with an area of  $0.02 \text{ cm}^2$  was placed on top of the solar cell to define the active area. The *J-V* curve can be measured by a Keithley 2450 source meter platform. The external quantum efficiency (EQE) spectra were measured by a QTEST HIFINITY 5 system (CROWNTECH, INC. USA) using a monochromatic light beam, calibrated by a reference silicon photodiode.

#### **Electrical conductivity measurement**

For temperature-dependent electrical conductivity measurement, devices with lateral structure of Au/single crystals/Au were fabricated. One sample is with the spin-coating of PEAI solution on the single crystal, which the other is not. A metal mask with gap width of  $40 \mu\text{m}$  and length of 1 mm was covered on the MAPbI<sub>3</sub> thin single crystals and then 80 nm Au electrode was deposited by thermal evaporation. The electrical conductivity at different temperatures was tested by a Keithley 4200 source meter. The applied voltage is from 0 to 8 V, with a temperature range of 180 to 300 K.

#### **Defect Density Testing**

The bulk defect density of the single crystal was calculated using the Mott-Gurney law. The current-voltage curves data of the manufactured ITO/PTAA/Perovskite/Au devices were measured in dark using the 2400 source meter from Keithley (U.S.A.) voltage scanned from 0 - 12V.

#### **Electrochemical Impedance Spectroscopy**

The electrochemical impedance spectroscopy (Nyquist plots) were measured using an impedance analyzer (PGSTAT 302N, Autolab, Eco-Chemie, The Netherlands) in the dark at  $-0.6 \text{ V}$  bias, with the magnitude and frequency of the alternative signal being  $10 \text{ mV}$  and  $10^{-1} - 10^5 \text{ Hz}$ , respectively. Impedance spectra were analyzed using an equivalent circuit model, and the model parameters were obtained by Nova software.

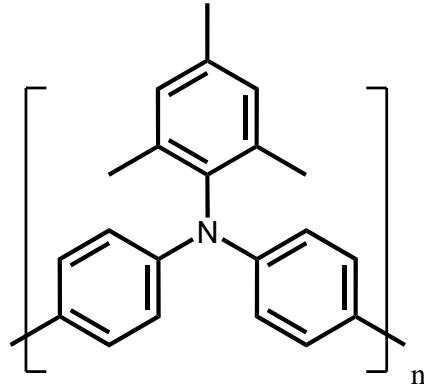

PTAA

**Figure S1.** Molecule structure of PTAA.

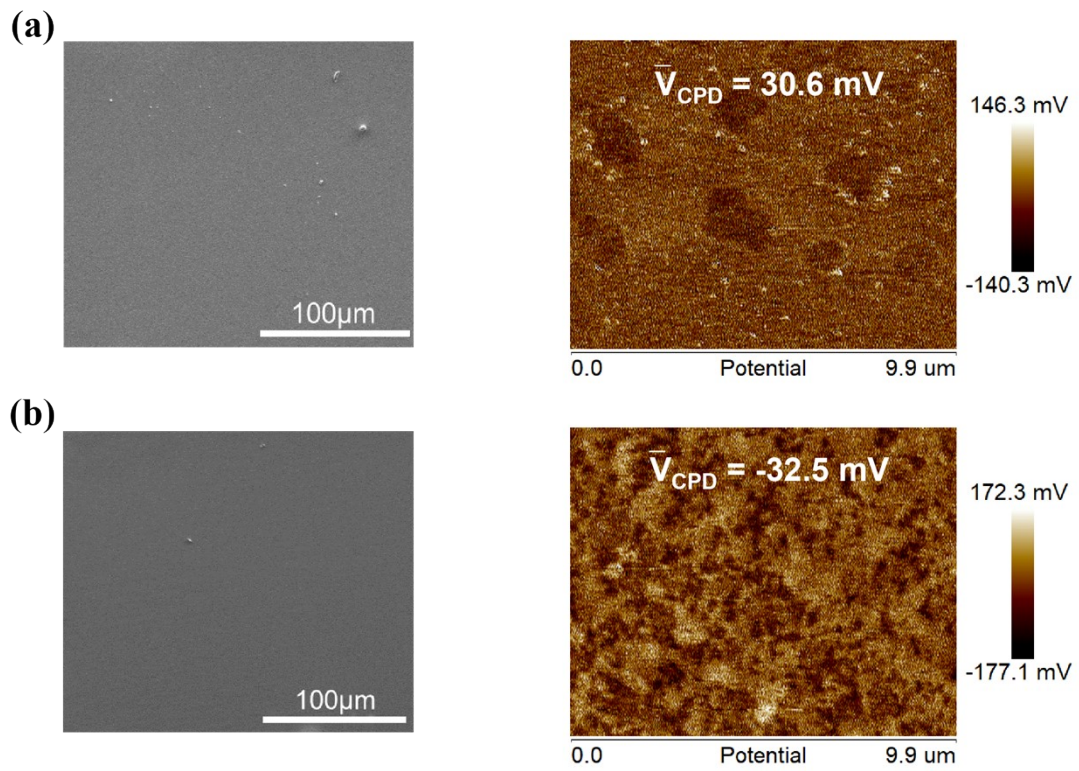

**Figure S2.** SEM and AFM images of MAPbI<sub>3</sub> single crystal film surface before (a) and after (b) PEAI modification.

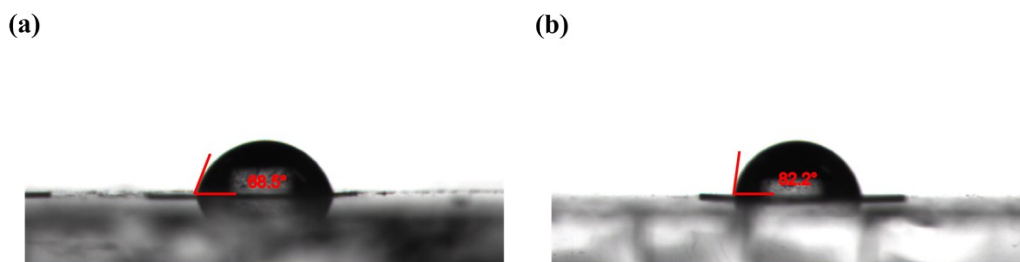

**Figure S3.** Contact angle of MAPbI<sub>3</sub> single crystal before (a) and after (b) PEAI modification.

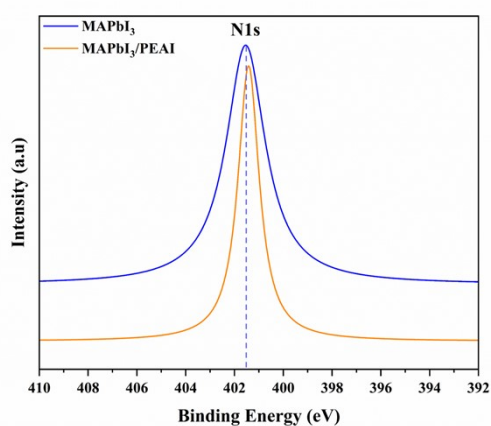

**Figure S4.** N1s orbit on the surface of MAPbI<sub>3</sub> single-crystal film before and after PEAI modification.

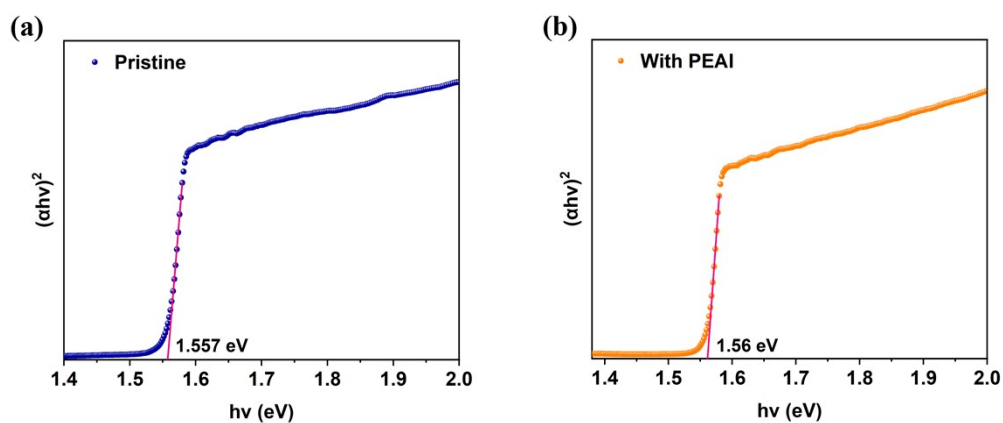

**Figure S5.** Bandgap of MAPbI<sub>3</sub> single crystal film before (a) and after (b) PEAI surface modification.

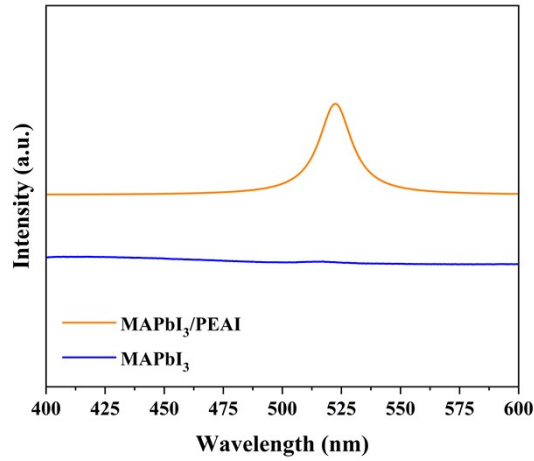

**Figure S6.** Steady-state PL spectra of MAPbI<sub>3</sub> single-crystal film before and after PEAI surface modification. The excitation wavelength is 375 nm.

### S7 Optical bandgap:

The calculation of the optical bandgap is carried out according to the Tauc formula <sup>[1,2]</sup>:

$$(\alpha h\nu)^{1/n} = B(h\nu - E_g)$$

Among them,  $\alpha$  is the absorbance coefficient, which is proportional to the absorbance in the absorption spectrum,  $h\nu$  is the energy of the photon at different wavelengths,  $E_g$  is the optical bandgap of the thin film. The value of  $n$  is related to the type of semiconductor, since CH<sub>3</sub>NH<sub>3</sub>PbI<sub>3</sub> is a direct bandgap semiconductor, 1/2 is taken. Taking  $(\alpha h\nu)^2$  as the ordinate and  $h\nu$  as the abscissa to plot, and the intersection point of the linear part with the X-axis is the optical band gap value of the material.

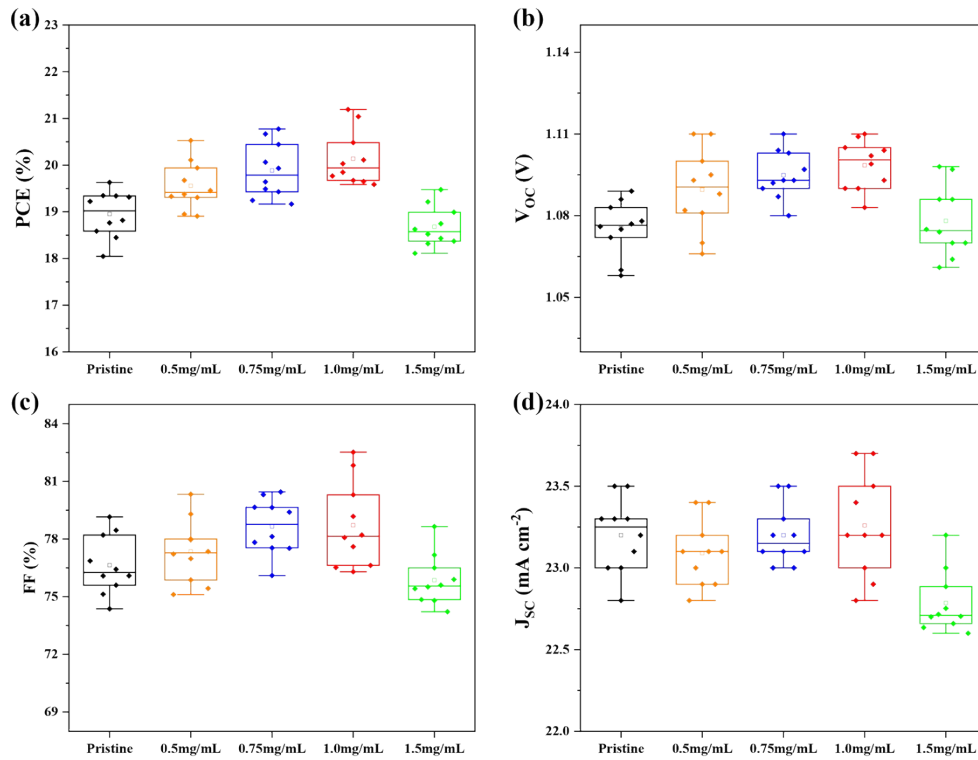

**Figure S8.** Statistical distribution of (a) PCE, (b)  $V_{OC}$ , (c) FF, (d)  $J_{SC}$  based on 10 solar cell devices.

### S9 Hysteresis Index:

Since there are some differences in the J-V curves of different scanning directions, the hysteresis index [3] was introduced in order to assess the degree of hysteresis between the J-V curves obtained from the positive and negative scanning directions.

$$\text{Hysteresis index} = \frac{PCE_{Reverse} - PCE_{Forward}}{PCE_{Reverse}}$$



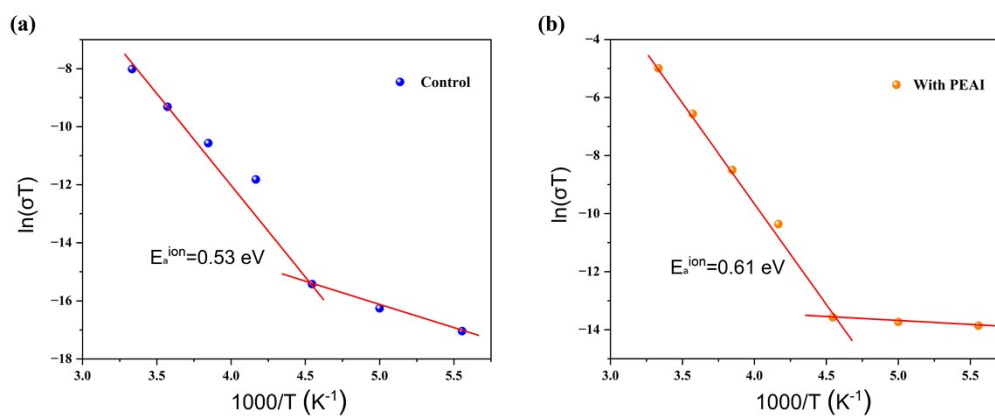

**Figure S10.** Temperature-dependent electrical conductivity of the MAPbI<sub>3</sub> single crystals (a) without and (b) with PEAI modification.

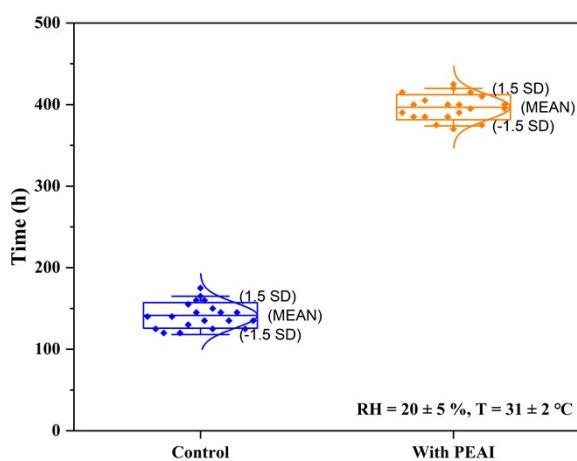

**Figure S11.** Statistical distribution of air stability T90 (decay time to retain 90% of initial efficiency) for 20 MAPbI<sub>3</sub> devices and 20 PEAI modification devices. Samples are placed in the air with  $T = 31 \pm 2 \text{ }^\circ\text{C}$  and  $RH = 20 \pm 5 \%$ .

**Table S1.** Fitting parameters of TRPL spectra for MAPbI<sub>3</sub> single crystal films before and after PEAI modification.

| Sample                             | A1(%) | $\tau_1$ (ns) | A1(%) | $\tau_2$ (ns) | $\tau_{avg}$ (ns) |
|------------------------------------|-------|---------------|-------|---------------|-------------------|
| Glass/PTAA/MAPbI <sub>3</sub>      | 88    | 0.75          | 12    | 6.15          | 3.61              |
| Glass/PTAA/MAPbI <sub>3</sub> /PEA | 71    | 4.5           | 29    | 8.42          | 6.31              |

I

**Table S2.** Performance parameters of MAPbI<sub>3</sub> single crystal solar cells before and after PEAI surface modification.

| Condition | Scan direction | $J_{SC}/mA \cdot cm^{-3}$ | $V_{OC}/V$ | FF/%  | PCE/% | Hysteresis index |
|-----------|----------------|---------------------------|------------|-------|-------|------------------|
| Pristine  | Reverse        | 23.8                      | 1.053      | 78.66 | 19.71 | 7.46%            |
|           | Forward        | 23.1                      | 1.061      | 74.42 | 18.24 |                  |
| With PEAI | Reverse        | 23.9                      | 1.096      | 80.93 | 21.20 | 5.24%            |
|           | Forward        | 23.6                      | 1.092      | 77.81 | 20.05 |                  |

## Reference

- [1] J. Tong, Z. Song, D. H. Kim, X. Chen, C. Chen, A. F. Palmstrom, P. F. Ndione, M. O. Reese, S. P. Dunfield, O. G. Reid, J. Liu, F. Zhang, S. P. Harvey, Z. Li, S. T. Christensen, G. Teeter, D. Zhao, M. M. Al-Jassim, M. van Hest, M. C. Beard, S. E. Shaheen, J. J. Berry, Y. Yan, K. Zhu, *Science (New York, N.Y.)*, **2019**, 364, 475-479.
- [2] D. Shi, V. Adinolfi, R. Comin, M. Yuan, E. Alarousu, A. Buin, Y. Chen, S. Hoogland, A. Rothenberger, K. Katsiev, Y. Losovyj, X. Zhang, P. A. Dowben, O. F. Mohammed, E. H. Sargent, O. M. Bakr, *Science (New York, N.Y.)*, **2015**, 347, 519-522.
- [3] Severin N. Habisreutinger, Nakita K. Noel, Henry J. Snaith, *ACS Energy Lett.*, **2018** 3 (10), 2472-2476
